# Supplementary material for: New supramolecular polymers containing both terpyridine metal complexes and quadruple hydrogen bonding unitsElectronic supplementary information (ESI) available: experimental details. See http://www.rsc.org/suppdata/cc/b3/b314459n/
Source: Royal Society of Chemistry journal article supplement (doi:10.1039/b314459n), 2004-01-01
Supplement: b314459n.doc [file b314459n.doc]

# New supramolecular polymers containing both terpyridine metal complexes and quadruple hydrogen bonding units

## Experimental

### Materials an instrumentation

Basic chemicals were obtained from Sigma-Aldrich. Compound **I**[[1]](#endnote-2) was synthesized from 4'-chloro-2,2':6',2"-terpyridine[[2]](#endnote-3) and 6-[3-(6-methyl-4-oxo-1,4-dihydro-pyrimidin-2-yl)-ureido]-hexyliscyanate **II** according to ref.[[3]](#endnote-4) The aminoterpyridine **III** has been prepared according to ref.[[4]](#endnote-5) 6-(1-Ethylpentyl)-isocytosine has been activated with carbonyldiimidazole (CDI) to yield compound **IV** according to a literature procedure.[[5]](#endnote-6) NMR spectra were measured on a Varian Mercury 400 NMR spectrometer. The chemical shifts were calibrated to the residual solvent peaks. UV-vis spectra were recorded on a Perkin Elmer Lamda-45 (1 cm cuvettes) and IR spectra were obtained on a Perkin Elmer Spectrum-1 ATR-FT-IR-spectrometer. Viscosity investigations were performed at 20 °C on a Schott AVS 350 vis­cosimetry system using Ubbelohde viscosimeters with a capillary diameter of 0.4 mm and chloroform as solvent.

### {6-[3-(6-Methyl-4-oxo-1,4-dihydro-pyrimidin-2-yl)-ureido]-hexyl}-carbamic acid 5-([2,2';6',2"]­terpyridin-4'-yloxy)-pentyl ester (**1**)

500 mg (1.49 mmol) of **I** and 525 mg (1.75 mmol) of **II** were dissolved in 2 mL chloroform and heated to 65 °C. Then 12 mg (0.12 mmol) of dibutyltindelaureate (DBTDL) was added and stirring was continued overnight. A white precipitate formed (probably urea) which was removed by filtration and the solution was concentrated *in vacuo* yielding 607 mg (0.97 mmol, 65%) of **1** as a white solid.

1H-NMR (400 MHz, CHCl3): *δ* (ppm) = 1.35-1.89 (m, 14 H, CH2), 2.18 (s, 3 H, CH3), 3.16 (dd, 2 H, 3*J*(CH-NH) = 5.86 Hz, 3*J*(CH-CH2) = 6.59 Hz, NHCH2), 3.23 (dt, 2 H, 3*J*(CH-NH) = 5.86 Hz, 3*J*(CH-CH2) = 6.59 Hz, NHCH2), 4.09 (t, 2 H, 3*J*(H,H) = 6.59 Hz, OCH2), 4.23 (t, 2 H, 3*J*(H,H) = 6.59 Hz, OCH2), 4.99 (s, 1 H, NH), 5.82 (s, 1 H, CH), 7.36 (m, 2 H, H5,5''), 7.88 (dd, 2 H, 3*J*(H4-H3; H4"-H3") = 7.32, 3*J*(H4-H5; H4"-H5") = 7.32 Hz, H4,4''), 8.06 (s, 2 H, H3',5'), 8.63 (d, 2 H, 3*J*(H3-H4; H3"-H4") = 7.32 Hz, H3,3"), 8.70 (d, 2 H, 3*J*(H6-H5; H6"-H5") = 5.86 Hz, H6,6"), 10.10 (s, 1 H, NH), 11.79 (s, 1 H, NH), 13.08 (s, 1 H, NH).

MALDI-TOF-MS: m/z = 630.01 [M+H]+, 652.00 [M+Na]+.

UV-vis (CHCl3): *λmax* (**) = 280 (27800) nm (L mol–1 cm–1).

### 4'-{6-[3-(6-Methyl-4-oxo-1,4-dihydro-3-heptyl-pyrimidin-2-yl)-ureido]-hexyl-}-2,2';6',2"-terpyridine **2**

The CDI-activated 6-(1-ethylpentyl)-isocytosine **IV** (218 mg; 0.719 mmol) was mixed with 5-aminopentylterpyridine **III** (200 mg; 0.598 mmol) in 20 mL of chloroform and reacted overnight at RT. The solution was extracted with water to remove unreacted **IV**, dried over NaSO4 and the solvent evaporated *in vacuo*. Finally, the compound was recrystallized from chloroform/pentane to yield 302 mg (89 %) of **2** as a white solid.

1H-NMR (400 MHz, CHCl3): *δ* (ppm) = 0.85 (m, 6 H, CH3), 1.24 (m, 4 H, CH2), 1.58 (m, 6 H, CH2), 1.73 (m, 2 H, CH2), 1.91, (m, 2 H, CH2), 2.26 (m, 1 H, CH), 3.31 (t, 2 H, *J* = 6.84 Hz, OCH2), 4.24, (t, 2 H, *J* = 6.59 Hz, OCH2), 5.80 (s, 1 H, CH), 7.36 (dd, 2 H, *J* = 7.82, 4.89 Hz, H5,5''), 7.83 (ddd, 2 H, *J* = 7.82, 7.82, 1.96 Hz, H4,4''), 7.99 (s, 2 H, H3',5'), 8.60 (d, 2 H, *J* = 7.82 Hz, H3,3"), 8.67 (d, 2 H, *J* = 4.89 Hz, H6,6"), 10.28 (s, 1 H, NH), 11.94 (s, 1 H, NH), 13.22 (s, 1 H, NH).

13C-NMR (100 MHz, CHCl3): *δ* (ppm) = 11.63, 13.84, 22.43, 25.61, 26.66, 26.51, 28.92, 28.9, 29.31, 29.23, 32.78, 39.92, 45.25, 68.11, 70.51, 106.16, 107.34, 121.28, 123.69, 136.70, 148.95, 154.82, 155.36, 156.14, 156.68, 156.96, 167.27, 173.12.

MALDI-TOF-MS: m/z = 584.28 [MH]+.

UV-vis (CHCl3): *λmax* (**) = 277 (29400) nm (L mol–1 cm–1).

IR: 1/ (cm–1) = 3209.8 (w), 2929.4 (m), 2859.4 (m), 1698.0 (m), 1645.8 (s), 1577.8 (s), 1523.2 (s),1457.0 (s), 1442.7 (s), 1406.2 (s), 1354.6 (s), 1312.7 (m),1246.0 (s), 1232.1 (m), 1200.7 (s), 1146.7 (w), 1122.4 (w), 1091.3 (m), 1049.5 (w), 1023.1 (s), 989.2 (w), 952.2 (w), 922.8 (m), 902.0 (w), 872.7 (m), 847.5 (m), 793.4 (s), 774.7 (m), 744.4 (s), 734.9 (s), 697.6 (m), 658.9 (m).

### {6-[3-(6-Methyl-4-oxo-1,4-dihydro-pyrimidin-2-yl)-ureido]-hexyl}-carbamic acid 5-([2,2';6',2"]­terpyridin-4'-yloxy)-pentyl ester zinc(II) hexafluorophosphate (**3**)

To a solution of 20 mg (0.032 mmol) of **1** in chloroform was added a methanolic solution of Zn(II) acetate (3.5 mg, 0.032 mmol). Then an excess of ammonium hexafluorophosphate was added and the product **3** was precipitated in diethyl ether to yield 35.7 mg (0.022 mmol, 68%) of a white powder.

1H-NMR (400 MHz, CH2Cl2): *δ* (ppm) = 0.95-1.41 (m, 8 H, CH2), 1.59-1.86 (m, 6 H, CH2), 2.14 (s, 3 H, CH3), 2.76-3.05 (m, 4 H, NHCH2), 4.10 (m, 2 H, OCH2), 4.50 (m, 2 H, OCH2), 5.63-5.79 (m, 2 H, NH, CH), 7.40 (m, 2 H, H5,5''), 7.75 (m, 2 H, H4,4''), 8.11 (m, 4 H, H3',5',6,6"), 8.49 (m, 2 H, H3,3"), 10.03 (2s, 1 H, NH), 11.80 (2s, 1 H, NH), 13.04 (2s, 1 H, NH).

MALDI-TOF-MS: m/z = 691.7 [M – 1 ligand **3** – 2 PF6]+.

UV-vis (CHCl3): *λmax* (**) = 241 (66400), 274 (47800), 310 (25800), 323 (27200) nm (L mol–1 cm–1).

### UV-vis titration

0.743 mg (0.00124 mmol) of ligand **1** was dissolved in 25 mL of chloroform and 0.854 mg (0.0043 mmol) of iron(II) chloride was dissolved in 400 L methanol. This solution was added to the ligand in steps of 50 mL and the formation of the iron complex monitored by UV-vis spectroscopy after each addition.

### Viscosity titration

102 mg (0.175 mmol) of compound **2** was dissolved in 4 mL of chloroform and 20 mg (0.158 mmol) of iron(II) chloride was dissolved in 400 L of DMSO. This solution was added in steps of 20 or 40 L to the ligand solution and measured in a micro-Ubbelohde viscosimeter.

The integrity of the hydrogen bonds under these solvent conditions (chloroform with 3% of DMSO) has been checked by NMR. Neither a decrease of the intensity nor a broadening nor a shift of the peaks nor the appearance of new signals was observed. Nevertheless, DMSO is known to be a hydrogen bond acceptor solvent, but in small quantities the hydrogen bonds are still intact although the lifetime of the bond is shortened.[[6]](#endnote-7) These solvent-conditions were found to be the best option due to the solubility behavior of the titration agent (FeCl2), which was found to give the best results in terpyridine complexation titration experiments due to its ability for fast and complete complexation (leading exclusively to *bis*-complexes) and the purity of the compound.

1. U. S. Schubert, C. Eschbaumer, O. Hien, P. R. Andres,*Tetrahedr. Lett*. **2001**, *42*, 4705-4707. [↑](#endnote-ref-2)
2. S. Schmatloch, A. A. Precup, U. S. Schubert, *Design Monom. Polym.* **2002**, *5*, 211-221. [↑](#endnote-ref-3)
3. B. J. B. Folmer, R. P. Sijbesma, R. M. Versteegen, J. A. J. van der Rijt, E. W. Meijer, *Adv. Mater.* **2000**, *12*, 874-878. [↑](#endnote-ref-4)
4. U. S. Schubert, C. Eschbaumer, O. Hien, P. R. Andres,*Tetrahedr. Lett*. **2001**, *42*, 4705-4707. [↑](#endnote-ref-5)
5. H. M. Keizer, A. Razmir, R. P. Sijbesma, E. W. Meijer, *Polym. Prepr.* **2003**, *44*, 596-597. [↑](#endnote-ref-6)
6. F. H. Beijer, R. P. Sijbesma, H. Kooijman, A. L. Spek, E. W.Meijer, *J. Am. Chem. Soc.* **1998**, *120*, 6761-6769. [↑](#endnote-ref-7)
